# Supplementary material
Source: MDPI journal article supplement (https://www.mdpi.com/2624-8549/2/1/7)
Supplement: s1 [file s1]

**Uranyl ion complexes of polycarboxylates - steps towards isolated  
photoactive cavities**

*Jack Harrowfield and Pierre Thuéry*

**SUPPLEMENTARY MATERIAL**

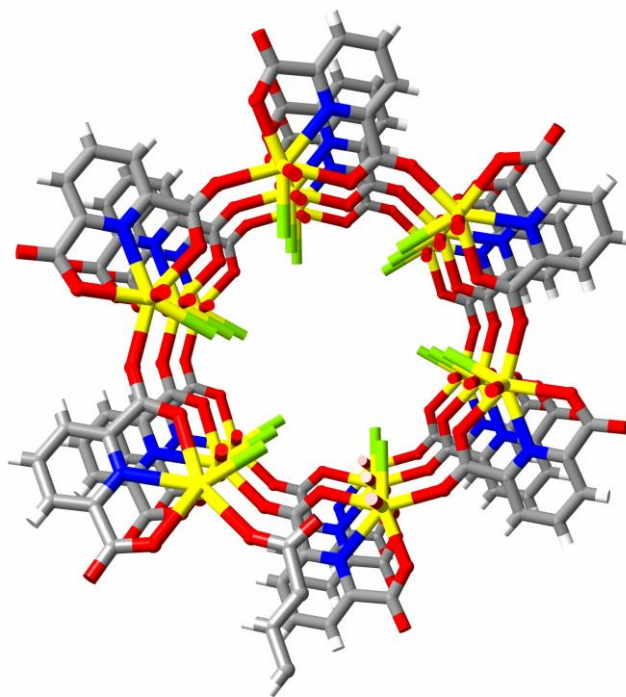

*Figure S1* Perspective view of one helical tube within the crystal of  $[\text{UO}_2(\text{dipic})(\text{OH}_2)]$ . The water molecules (oxygen coloured green) appear to be involved in *H*-bonding to carboxylate-*O* atoms and not to any species which could possibly be held within the tube.

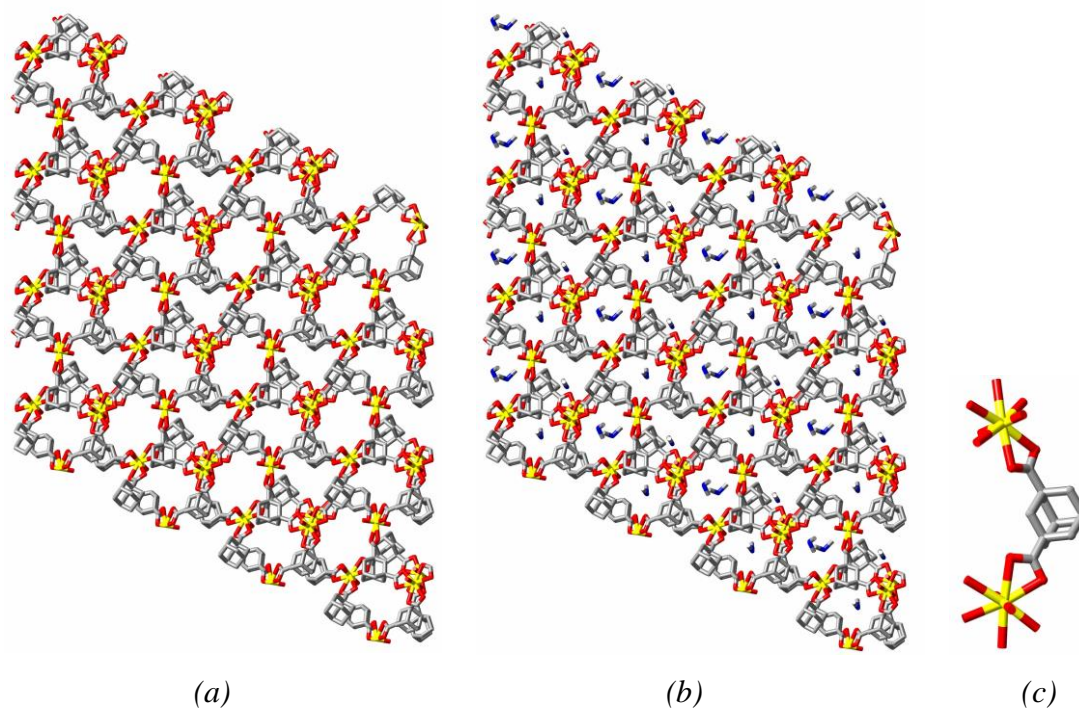

*Figure S2* Views, down *a*, of the triperiodic structure of  $[\text{H}_2\text{NMe}_2]_2[(\text{UO}_2)_2(\text{adc})_3] \cdot 4.5\text{H}_2\text{O}$ , complex **H**, showing the various channels (a) without and (b) with dimethylammonium counter cations shown. The ligand binding mode is shown in (c).

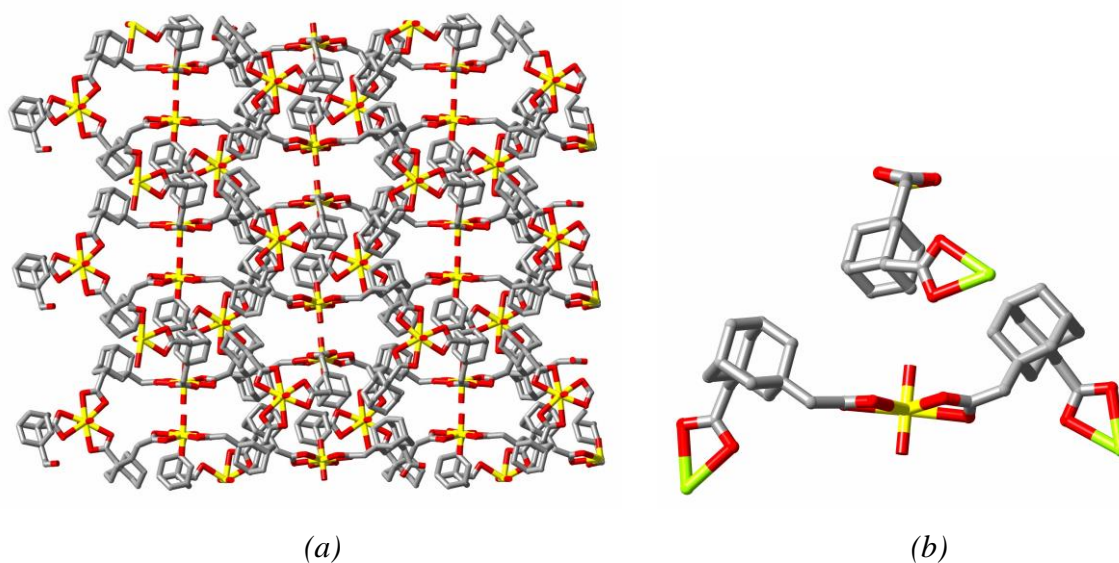

**Figure S3** (a) A partial view, along *a*, of one of the diperiodic sheets found in the crystal of  $[\text{H}_2\text{NMe}_2]_2[(\text{UO}_2)_2(\text{ada})_3] \cdot 1.5\text{H}_2\text{O}$ , complex **I** (cations and H-atoms not shown); (b) The three inequivalent ligand units within the structure, showing the somewhat divergent orientations of the carboxylate groups on each. (The inequivalent uranium atoms are shown in yellow and green.)

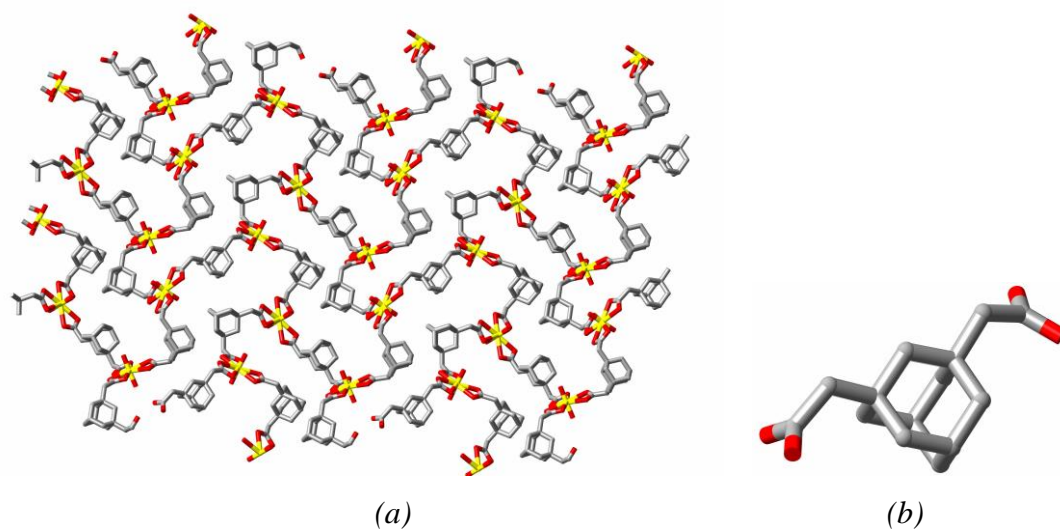

**Figure S4** (a) A partial view of one of the diperiodic anionic polymer sheets (counter cations not shown) in the crystal of  $[\text{H}_2\text{NMe}_2][\text{PPh}_3\text{Me}][(\text{UO}_2)_2(\text{ada})_3] \cdot \text{H}_2\text{O}$ , complex **J**; (b) the ligand unit in this sheet showing complete divergency of the carboxylate groups.

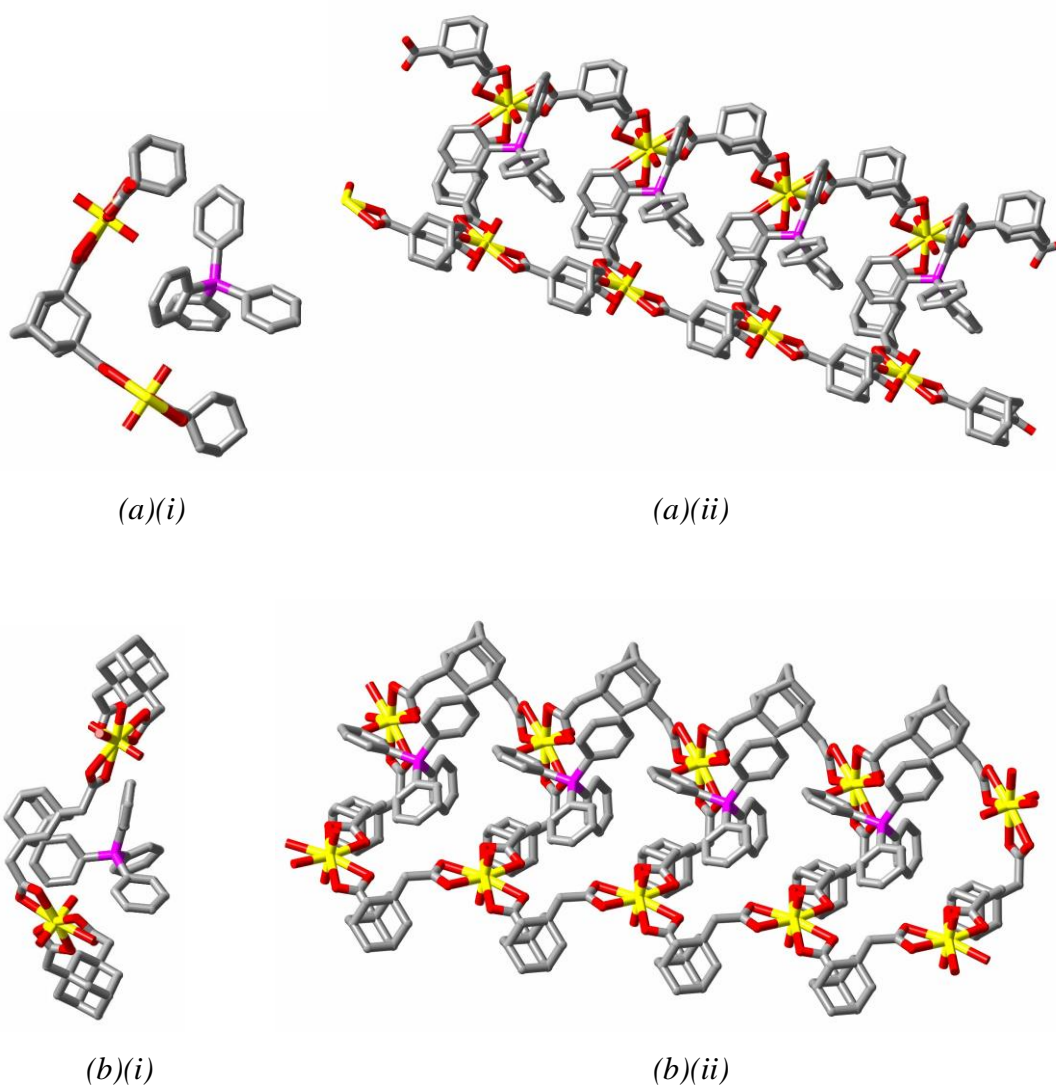

Figure S5 Views, (i) down *a* and (ii) in perspective, of the trough-like anionic monoperiodic polymers and their closest cations found in the crystals of (a)  $[PPh_4]_2[(UO_2)_2(adc)_3] \cdot 2H_2O$ , complex **M**, and (b)  $[PPh_4]_2[(UO_2)_2(ada)_3]$ , complex **N**.
